# Supplementary material
Source: PubMed Central journal article supplement (PMC6486453)
Supplement: NIHMS1509773-supplement-Table_1.pdf [file NIHMS1509773-supplement-Table_1.pdf]

**Table 1. Summary of all the fusion+ cases**

| Tumor Type                                               | Gene fusion by Archer | Number of Cases | Gender | Median Age at Diagnosis | Locations                                                          | Confirmation by FISH, NGS or RT-PCR |
|----------------------------------------------------------|-----------------------|-----------------|--------|-------------------------|--------------------------------------------------------------------|-------------------------------------|
| Alveolar Soft Part Sarcoma                               | ASPCR1-TFE3           | 2               | F      | 24                      | Extremity                                                          | not done                            |
| Clear cell sarcoma of soft tissue                        | EWSR1-ATF1            | 1               | F      | 63                      | Chest wall                                                         | FISH+                               |
| Desmoplastic small round cell tumor                      | EWSR1-WT1             | 1               | M      | 47                      | Abdomen                                                            | not done                            |
| DFSP, fibrosarcomatous transformation                    | COL1A1-PDGFB          | 1               | M      | 67                      | Leg                                                                | not done                            |
| Ewing sarcoma                                            | EWSR1-ERG             | 5               | 5F, 9M | 28                      | Head and neck, trunk, pelvis&viscera, extremity, dura, mediastinum | 3 FISH+, 1 not done, 1 FISH-        |
|                                                          | EWSR1-FLI1            | 5               |        |                         |                                                                    | 2 FISH+, 1 NGS+, 3 not done         |
|                                                          | EWSR1-PATZ1           | 1               |        |                         |                                                                    | EWSR1 FISH-, NGS+                   |
|                                                          | FUS-FEV               | 2               |        |                         |                                                                    | 1 FISH+, 1 not done                 |
|                                                          | FUS-ERG               | 1               |        |                         |                                                                    | FISH+                               |
| Ewing-like sarcoma (undifferentiated round cell sarcoma) | BCOR-CCNB3            | 3               | 7F, 3M | 27.5                    | Head and neck, trunk, extremity, pelvis&viscera                    | 1 FISH+, 2 not done                 |
|                                                          | CIC-CUX4              | 7               |        |                         |                                                                    | 1 FISH+, 6 not done                 |
| Extraskeletal myxoid chondrosarcoma                      | EWSR1-NR4A3           | 1               | 2M     | 47                      | Thigh                                                              | 1 FISH+, 1 not done                 |
|                                                          | TAF15-NR4A3           | 1               |        |                         |                                                                    |                                     |
| Hemangioendothelioma, Epithelioid                        | WWTR1-CAMTA1          | 4               | 3F, 1M | 39.5                    | Liver, mediastinum                                                 | 1 FISH+, 2 not done                 |
| Hemangioendothelioma, Pseudomyogenic                     | ACTB-FOSB             | 2               | 1F, 1M | 34.5                    | Shoulder, vertebra                                                 | 1 FISH-, 1 not done                 |
| Infantile fibrosarcoma                                   | ETV6-NTRK3            | 1               | F      | 2                       | Cheek                                                              | FISH+                               |
| Inflammatory myofibroblastic tumor                       | ETV6-NTRK3            | 2               | 2F, 2M | 18.5                    | Lung and chest wall                                                | 2 FISH+                             |
|                                                          | TFG-ROS1              | 1               |        |                         |                                                                    | FISH+, NGS+                         |
|                                                          | EML4-ALK              | 1               |        |                         |                                                                    | not done                            |
|                                                          | TPM3-NTRK1            | 1               |        |                         |                                                                    | not done                            |
| Lipofibromatosis-like neural tumor                       | LMNA-NTRK1            | 1               | 1F, 1M | 50                      | Extremity                                                          | not done                            |
|                                                          | TPM3-NTRK1            | 1               |        |                         |                                                                    | not done                            |
| Liposarcoma, myxoid/round cell                           | FUS-DDIT3             | 3               | 1F, 2M | 32                      | Thigh, scrotum                                                     | 2 FISH+, 1 not done                 |
| Perivascular epithelioid cell tumor cell tumor           | VCP-TFE3              | 1               | M      | 69                      | Pancreas                                                           | FISH+                               |
| Rhabdomyosarcoma, alveolar                               | PAX3-FOXO1            | 5               | 5F, 2M | 10                      | Extremity, head & neck                                             | 5 FISH+, 1 RT-PCR+, 1 not done      |
|                                                          | PAX7-FOXO1            | 2               |        |                         |                                                                    |                                     |
| Rhabdomyosarcoma, NOS                                    | FUS-TFCP2             | 1               | F      | 74                      | Oral mucosa                                                        | FISH+                               |
| Soft Tissue Myoepithelial tumor                          | TRPS1-PLAG1           | 1               | 1F, 1M | 34                      | Soft tissue                                                        | 1 FISH+, 1 not done                 |
|                                                          | CTNNB1-PLAG1          | 1               |        |                         | Sacral soft tissue                                                 |                                     |
| Solitary Fibrous Tumor                                   | NAB2-STAT6            | 9               | 4F, 5M | 51                      | Head & neck, trunk abdomen, extremities                            | 2 NGS+                              |
| Synovial sarcoma                                         | SS18-SSX1             | 6               | 4F, 5M | 39                      | Extremity, proximal limb, lung                                     | 6 FISH+, 3 not done                 |
|                                                          | SS18-SSX2             | 3               |        |                         |                                                                    |                                     |
| Sarcoma, NOS                                             | MYLK-BRAF             | 1               | 2F, 1M | 49                      | Lung, abdomen                                                      | not done                            |
|                                                          | ZC3H7B-BCOR           | 1               |        |                         |                                                                    | not done                            |
|                                                          | TPM3-NTRK1            | 1               |        |                         |                                                                    | NGS+                                |
