# Supplementary material
Source: PubMed Central journal article supplement (PMC6486453)
Supplement: NIHMS1509773-supplement-Table_2.pdf [file NIHMS1509773-supplement-Table_2.pdf]

**Table 2. Fusions with novel partner gene or novel breakpoint**

| <b>Tumor Type</b>                    | <b>Novel fusion or breakpoint</b> | <b>5' Partner</b> | <b>3' Partner</b> | <b>Age</b> | <b>Gender</b> | <b>Location</b> | <b>FISH</b>       |
|--------------------------------------|-----------------------------------|-------------------|-------------------|------------|---------------|-----------------|-------------------|
| Soft Tissue Myoepithelial Tumor      | TRPS1-PLAG1                       | Exon1             | Exon2             | 25         | M             | Foot            | PLAG1 rearranged  |
| Perivascular Epithelioid Cell Tumor  | VCP-TFE3                          | Exon11            | Exon6             | 69         | M             | Pancreas        | TFE3 rearranged   |
| Hemangioendothelioma, Pseudomyogenic | ACTB-FOSB                         | Exon3             | Exon2             | 54         | F             | Shoulder        | Negative for FOSB |
| Hemangioendothelioma, Pseudomyogenic | ACTB-FOSB                         | Exon3             | Exon2             | 15         | M             | T2 vertebra     | Not done          |
| Rhabdomyosarcoma, "epithelioid"      | FUS-TFCP2                         | Exon6             | Exon2             | 74         | F             | Maxillary gum   | FUS rearrangement |
| Sarcoma, NOS                         | MYLK-BRAF                         | Exon24            | Exon10            | 54         | F             | Lung            | Not done          |
