# Supplementary material
Source: PubMed Central journal article supplement (PMC6486453)
Supplement: NIHMS1509773-supplement-Table_3.pdf [file NIHMS1509773-supplement-Table_3.pdf]

**Table 3. Targetable or potentially targetable cases**

| <b>Tumor Type</b>                  | <b>Fusion</b> | <b>5' Partner</b> | <b>3' Partner</b> | <b>Age</b> | <b>Gender</b> | <b>Location</b>  |
|------------------------------------|---------------|-------------------|-------------------|------------|---------------|------------------|
| Infantile Fibrosarcoma             | ETV6-NTRK3    | Exon5             | Exon15            | 2          | F             | Cheek            |
| Inflammatory Myofibroblastic Tumor | ETV6-NTRK3    | Exon5             | Exon15            | 27         | M             | Chest Wall       |
| Inflammatory Myofibroblastic Tumor | ETV6-NTRK3    | Exon5             | Exon15            | 2          | M             | Lung             |
| Inflammatory Myofibroblastic Tumor | TFG-ROS1      | Exon4             | Exon35            | 10         | F             | Lung/Mediastinum |
| Inflammatory Myofibroblastic Tumor | EML4-ALK      | Exon2             | Exon20            | 41         | F             | Lung             |
| Lipofibromatosis-like Neural Tumor | TPM3-NTRK1    | Exon7             | Exon10            | 38         | M             | Forearm          |
| Lipofibromatosis-like Neural Tumor | LMNA-NTRK1    | Exon2             | Exon11            | 61         | F             | Leg Mass         |
| Sarcoma, NOS                       | TPM3-NTRK1    | Exon8             | Exon12            | 49         | M             | Thigh            |
| Sarcoma, NOS                       | MYLK-BRAF     | Exon24            | Exon10            | 54         | F             | Lung             |
